# Supplementary material
Source: PubMed Central journal article supplement (PMC3597206)
Supplement: supp_dev.087403_DEV087403.pdf [file supp_dev.087403_DEV087403.pdf]

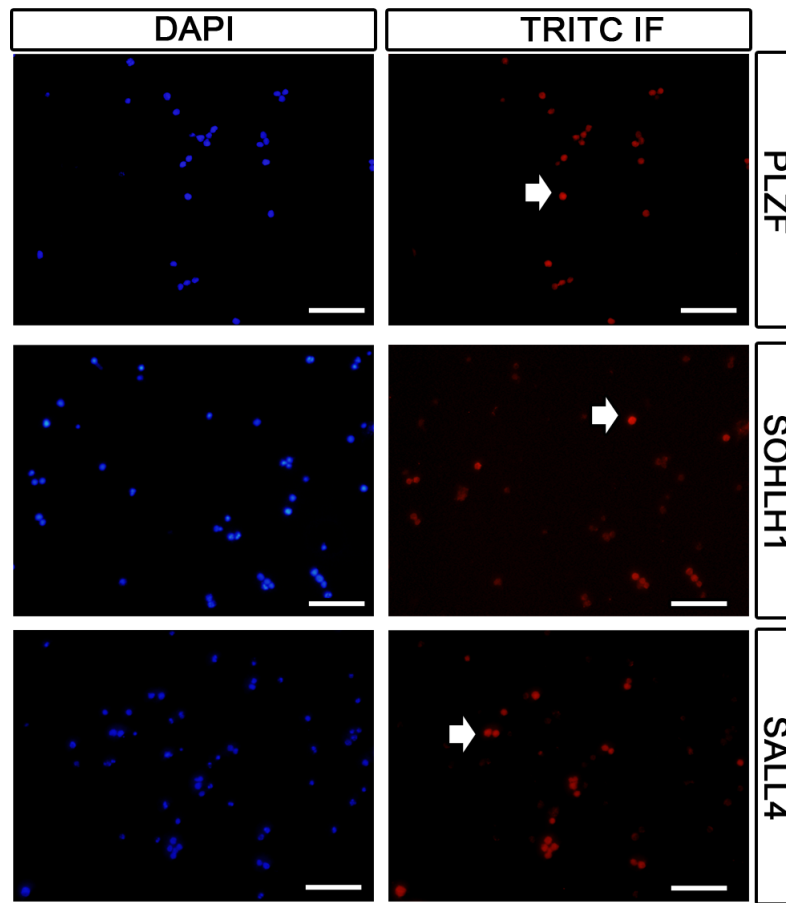

**Fig. S1. Expression of proteins implicated as regulators of *Kit* transcription in primary cultures of THY1<sup>+</sup> undifferentiated spermatogonia.** Representative images of fluorescence immunocytochemical staining for PLZF, SOHLH1, SALL4 and KIT expression in single-cell suspensions of cultured THY1<sup>+</sup> undifferentiated spermatogonial clumps. DAPI was used to stain cell nuclei. Arrows indicate representative positive cells in each TRITC immunofluorescent (IF) image. Scale bars: 100  $\mu$ m.

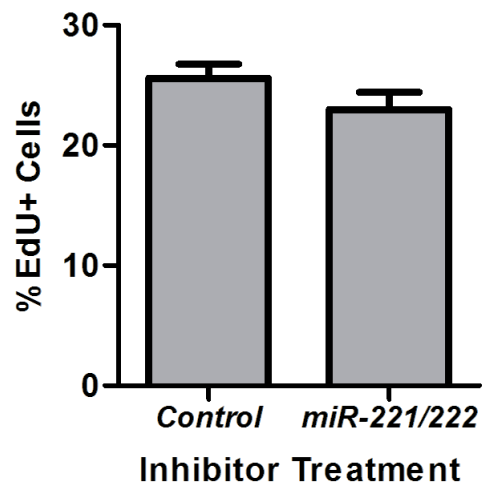

**Fig. S2. Impact of transient miR-221/222 function on cell cycle progression in primary cultures of THY1<sup>+</sup> undifferentiated spermatogonia.** Quantitative comparison of mitotic cells within primary cultures of THY1<sup>+</sup> undifferentiated spermatogonia 2 days after treatment with a non-targeting control or miR-221/222 inhibitors based on incorporation of EdU. Data are mean  $\pm$  s.e.m. for three different cultures.
